# Supplementary material
Source: PubMed Central journal article supplement (PMC7757752)

## Supplementary Data

**Table S1.** Average energy of electrons emitted during the decay of  $^{64}\text{Cu}$  as provided in the MIRD format.

|                         | $\beta^+$              | $\beta^-$               | Auger-K                 | Auger-L                 |
|-------------------------|------------------------|-------------------------|-------------------------|-------------------------|
| $y(i)^*$ (Bq-s) $^{-1}$ | $1.76 \times 10^{-01}$ | $3.85 \times 10^{-01}$  | $2.25 \times 10^{-01}$  | $5.77 \times 10^{-01}$  |
| $E(i)^{**}$ (MeV)       | $2.782 \times 10^{-1}$ | $1.907 \times 10^{-01}$ | $6.540 \times 10^{-03}$ | $8.400 \times 10^{-04}$ |

\* $y(i)$ : number of  $i^{\text{th}}$  transitions per nuclear transformation. \*\* $E(i)$ : mean energy of the  $i^{\text{th}}$  transition.

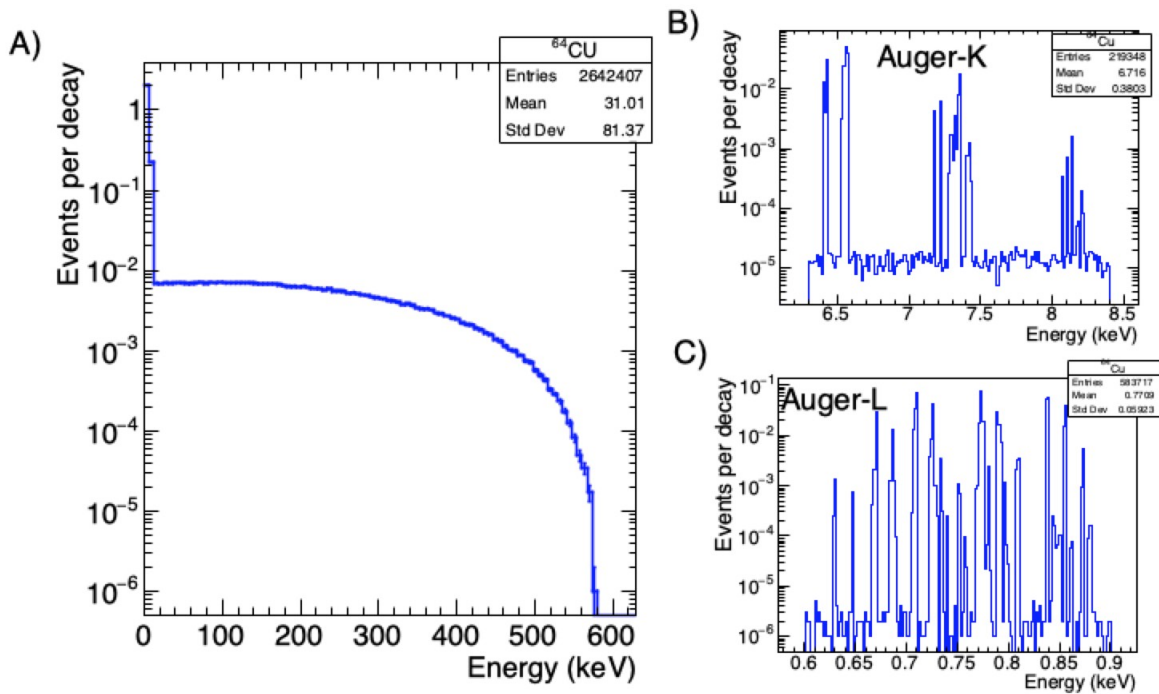

Supplement: NIHMS1652993-supplement-TableAndFigure.pdf [file NIHMS1652993-supplement-TableAndFigure.pdf]
